# Supplementary material for: Household Food Insecurity, Anemia, Malnutrition and Unfavorable Dietary Diversity among Adolescents: Quadruple Whammies in the Era of Escalating Crises in Lebanon
Source: MDPI journal article supplement (doi:10.3390/nu14245290), 2022-12-12
Supplement: s1 [file s1]

**Table S1.** The correlates associated with the adolescents' nutrition status and adolescents' self-reported FI.

|                                     | Stunting<br>(HAZ < -2 SD) |                     | Thinness<br>(BAZ < -2 SD) |                     | Overweight or Obesity<br>(BAZ > 1 SD) |                     | Anemia             |                     | Self-reported FI            |                               | <i>p</i> -value<br>(a) | <i>p</i> -value<br>(b) | <i>p</i> -value<br>(c) | <i>p</i> -value<br>(d) | <i>p</i> -value<br>(e) |
|-------------------------------------|---------------------------|---------------------|---------------------------|---------------------|---------------------------------------|---------------------|--------------------|---------------------|-----------------------------|-------------------------------|------------------------|------------------------|------------------------|------------------------|------------------------|
|                                     | No<br><i>n</i> (%)        | Yes<br><i>n</i> (%) | No<br><i>n</i> (%)        | Yes<br><i>n</i> (%) | No<br><i>n</i> (%)                    | Yes<br><i>n</i> (%) | No<br><i>n</i> (%) | Yes<br><i>n</i> (%) | Food-secure<br><i>n</i> (%) | Food-insecure<br><i>n</i> (%) |                        |                        |                        |                        |                        |
| <b>Adolescents' gender</b>          |                           |                     |                           |                     |                                       |                     |                    |                     |                             |                               | 0.54                   | <b>0.004</b>           | 0.09                   | 0.80                   | 0.59                   |
| Girl                                | 228 (92.7)                | 18 (7.3)            | 241 (98.0)                | 5 (2.0)             | 175 (71.1)                            | 71 (28.9)           | 206 (83.7)         | 40 (16.3)           | 116 (47.2)                  | 13 (52.8)                     |                        |                        |                        |                        |                        |
| Boy                                 | 192 (94.1)                | 12 (5.9)            | 188 (92.2)                | 16 (7.8)            | 130 (63.7)                            | 74 (36.3)           | 169 (82.8)         | 35 (17.2)           | 91 (44.6)                   | 113 (55.4)                    |                        |                        |                        |                        |                        |
| <b>Adolescents' age</b>             |                           |                     |                           |                     |                                       |                     |                    |                     |                             |                               | 0.13                   | 0.48                   | 0.70                   | 0.85                   | 0.65                   |
| Young adolescents                   | 164 (91.1)                | 16 (8.9)            | 169 (93.9)                | 11 (6.1)            | 124 (68.9)                            | 56 (31.1)           | 152 (84.4)         | 28 (15.6)           | 78 (43.3)                   | 102 (56.7)                    |                        |                        |                        |                        |                        |
| Middle-aged adolescents             | 113 (92.6)                | 9 (7.4)             | 117 (95.9)                | 5 (4.1)             | 79 (64.8)                             | 43 (35.2)           | 100 (82.0)         | 22 (18.0)           | 58 (47.5)                   | 64 (52.5)                     |                        |                        |                        |                        |                        |
| Older adolescents                   | 143 (96.6)                | 5 (3.4)             | 143 (96.6)                | 5 (3.4)             | 102 (68.9)                            | 46 (31.1)           | 123 (83.1)         | 25 (16.9)           | 71 (48.0)                   | 77 (52.0)                     |                        |                        |                        |                        |                        |
| <b>Residence</b>                    |                           |                     |                           |                     |                                       |                     |                    |                     |                             |                               | 0.58                   | 0.73                   | 0.12                   | <b>0.01</b>            | <b>&lt;0.001</b>       |
| Mount Lebanon                       | 153 (91.1)                | 15 (8.9)            | 158 (94.0)                | 10 (6.0)            | 108 (64.3)                            | 60 (35.7)           | 144 (85.7)         | 24 (14.3)           | 90 (53.6)                   | 78 (46.4)                     |                        |                        |                        |                        |                        |
| Beirut                              | 26 (100.0)                | 0 (0.0)             | 25 (96.2)                 | 1 (3.8)             | 20 (76.9)                             | 6 (23.1)            | 22 (84.6)          | 4 (15.4)            | 10 (38.5)                   | 16 (61.5)                     |                        |                        |                        |                        |                        |
| South Lebanon                       | 60 (95.2)                 | 3 (4.8)             | 60 (95.2)                 | 3 (4.8)             | 47 (74.6)                             | 16 (25.4)           | 57 (90.5)          | 6 (9.5)             | 40 (63.5)                   | 23 (36.5)                     |                        |                        |                        |                        |                        |
| North Lebanon                       | 56 (96.6)                 | 2 (3.4)             | 57 (98.3)                 | 1 (1.7)             | 40 (69.0)                             | 18 (31.0)           | 43 (74.1)          | 15 (25.9)           | 17 (29.3)                   | 41 (70.7)                     |                        |                        |                        |                        |                        |
| Akkar                               | 36 (92.3)                 | 3 (7.7)             | 37 (94.9)                 | 2 (5.1)             | 23 (59.0)                             | 16 (41.0)           | 25 (64.1)          | 14 (35.9)           | 6 (15.4)                    | 33 (84.6)                     |                        |                        |                        |                        |                        |
| Beqaa                               | 28 (90.3)                 | 3 (9.7)             | 31 (100.0)                | 0 (0.0)             | 27 (87.1)                             | 4 (12.9)            | 27 (87.1)          | 4 (12.9)            | 12 (38.7)                   | 19 (61.3)                     |                        |                        |                        |                        |                        |
| Baalbeck-Hermel                     | 27 (96.4)                 | 1 (3.6)             | 27 (96.4)                 | 1 (3.6)             | 18 (64.3)                             | 10 (35.7)           | 25 (89.3)          | 3 (10.7)            | 10 (35.7)                   | 18 (64.3)                     |                        |                        |                        |                        |                        |
| Nabatieh                            | 34 (91.9)                 | 3 (8.1)             | 34 (91.9)                 | 3 (8.1)             | 22 (59.5)                             | 15 (40.5)           | 32 (86.5)          | 5 (13.5)            | 22 (59.5)                   | 15 (40.5)                     |                        |                        |                        |                        |                        |
| <b>Adolescents' education level</b> |                           |                     |                           |                     |                                       |                     |                    |                     |                             |                               | <b>0.02</b>            | 0.27 *                 | 0.09                   | 0.92                   | 0.87                   |
| School level                        | 329 (91.9)                | 29 (8.1)            | 339 (94.7)                | 19 (5.3)            | 236 (65.9)                            | 122 (34.1)          | 298 (83.2)         | 60 (16.8)           | 164 (45.8)                  | 194 (54.2)                    |                        |                        |                        |                        |                        |
| University level                    | 91 (98.9)                 | 1 (1.1)             | 90 (97.8)                 | 2 (2.2)             | 69 (75.0)                             | 23 (25.0)           | 77 (83.7)          | 15 (16.3)           | 43 (46.7)                   | 49 (53.3)                     |                        |                        |                        |                        |                        |
| <b>Primary caregiver</b>            |                           |                     |                           |                     |                                       |                     |                    |                     |                             |                               | 0.55 *                 | 0.78 *                 | 0.30 *                 | 0.38 *                 | 0.40 *                 |
| Mother                              | 10 (100.0)                | 0 (0.0)             | 10 (100.0)                | 0 (0.0)             | 6 (60.0)                              | 4 (40.0)            | 9 (90.0)           | 1 (10.0)            | 2 (20.0)                    | 8 (80.0)                      |                        |                        |                        |                        |                        |
| Father                              | 7 (100.0)                 | 0 (0.0)             | 7 (100.0)                 | 0 (0.0)             | 4 (57.1)                              | 3 (42.9)            | 6 (85.7)           | 1 (14.3)            | 3 (42.9)                    | 4 (57.1)                      |                        |                        |                        |                        |                        |
| Both (mother and father)            | 391 (92.9)                | 30 (7.1)            | 400 (95.0)                | 21 (5.0)            | 284 (67.5)                            | 137 (32.5)          | 348 (82.7)         | 73 (17.3)           | 197 (46.8)                  | 224 (53.2)                    |                        |                        |                        |                        |                        |
| Other caregivers                    | 12 (100.0)                | 0 (0.0)             | 12 (100.0)                | 0 (0.0)             | 11 (91.7)                             | 1 (8.3)             | 12 (100.0)         | 0 (0.0)             | 5 (41.7)                    | 7 (58.3)                      |                        |                        |                        |                        |                        |
| <b>Adolescents' employment</b>      |                           |                     |                           |                     |                                       |                     |                    |                     |                             |                               | 0.25 *                 | 0.65 *                 | 0.42                   | 0.11                   | 0.08                   |
| No                                  | 393 (93.8)                | 26 (6.2)            | 400 (95.5)                | 19 (4.5)            | 286 (68.3)                            | 133 (31.7)          | 346 (82.6)         | 73 (17.3)           | 188 (44.9)                  | 231 (55.1)                    |                        |                        |                        |                        |                        |
| Yes                                 | 27 (87.1)                 | 4 (12.9)            | 29 (93.5)                 | 2 (6.5)             | 19 (61.3)                             | 12 (38.7)           | 29 (93.5)          | 2 (6.5)             | 19 (61.3)                   | 12 (38.7)                     |                        |                        |                        |                        |                        |
| <b>Parental gender</b>              |                           |                     |                           |                     |                                       |                     |                    |                     |                             |                               | 0.92                   | 0.52                   | 0.88                   | 0.86                   | 0.20                   |
| Female                              | 248 (93.2)                | 18 (6.8)            | 255 (95.9)                | 11 (4.1)            | 181 (68.0)                            | 85 (32.0)           | 221 (83.1)         | 45 (16.9)           | 129 (48.5)                  | 137 (51.5)                    |                        |                        |                        |                        |                        |
| Male                                | 172 (93.5)                | 12 (6.5)            | 174 (94.6)                | 10 (5.4)            | 124 (67.4)                            | 60 (32.6)           | 154 (83.7)         | 30 (16.3)           | 78 (42.4)                   | 106 (57.6)                    |                        |                        |                        |                        |                        |
| <b>Parental age</b>                 |                           |                     |                           |                     |                                       |                     |                    |                     |                             |                               | 0.90                   | 0.09                   | 0.82                   | 0.24                   | 0.14                   |
| Middle aged adults                  | 215 (93.5)                | 15 (6.5)            | 223 (97.0)                | 7 (3.0)             | 157 (68.3)                            | 73 (31.7)           | 187 (81.3)         | 43 (18.7)           | 98 (42.6)                   | 132 (57.4)                    |                        |                        |                        |                        |                        |
| Old adults                          | 205 (93.2)                | 15 (6.8)            | 206 (93.6)                | 14 (6.4)            | 148 (67.3)                            | 72 (32.7)           | 188 (85.5)         | 32 (14.5)           | 109 (49.5)                  | 111 (50.5)                    |                        |                        |                        |                        |                        |
| <b>Parental weight status</b>       |                           |                     |                           |                     |                                       |                     |                    |                     |                             |                               | 0.82*                  | 0.31*                  | <b>0.002</b>           | 0.14                   | 0.49*                  |
| Underweight                         | 8 (100.0)                 | 0 (0.0)             | 7 (87.5)                  | 1 (12.5)            | 7 (87.5)                              | 1 (12.5)            | 8 (100.0)          | 0 (0.0)             | 4 (50.0)                    | 4 (50.0)                      |                        |                        |                        |                        |                        |

|                                                              |            |           |            |           |            |            |            |           |            |            |        |               |             |        |                  |
|--------------------------------------------------------------|------------|-----------|------------|-----------|------------|------------|------------|-----------|------------|------------|--------|---------------|-------------|--------|------------------|
| Normal                                                       | 204 (93.6) | 14 (6.4)  | 210 (96.3) | 8 (3.7)   | 163 (74.8) | 55 (25.2)  | 175 (80.3) | 43 (19.7) | 94 (43.1)  | 124 (56.9) |        |               |             |        |                  |
| Overweight/ Obese                                            | 208 (92.9) | 16 (7.1)  | 212 (94.6) | 12 (5.4)  | 135 (60.3) | 89 (39.7)  | 192 (85.7) | 32 (14.3) | 109 (48.7) | 115 (51.3) |        |               |             |        |                  |
| <b>Parental marital status</b>                               |            |           |            |           |            |            |            |           |            |            | 0.68 * | 1.0 *         | 0.21 *      | 0.26 * | 0.72 *           |
| Married                                                      | 402 (93.3) | 29 (6.7)  | 410 (95.1) | 21 (4.9)  | 293 (68.0) | 138 (32.0) | 357 (82.8) | 74 (17.2) | 199 (46.2) | 232 (53.8) |        |               |             |        |                  |
| Divorced                                                     | 8 (88.9)   | 1 (11.1)  | 9 (100.0)  | 0 (0.0)   | 4 (44.4)   | 5 (55.6)   | 8 (88.9)   | 1 (11.1)  | 3 (33.3)   | 6(66.7)    |        |               |             |        |                  |
| Widowed                                                      | 10 (100.0) | 0 (0.0)   | 10 (100.0) | 0 (0.0)   | 8 (80.0)   | 2 (20.0)   | 10 (100.0) | 0 (0.0)   | 5 (50.0)   | 5 (50.0)   |        |               |             |        |                  |
| <b>Number of children per household</b>                      |            |           |            |           |            |            |            |           |            |            | 0.17   | 0.09          | 0.10        | 0.58   | 0.07             |
| One child                                                    | 34 (100.0) | 0 (0.0)   | 34 (100.0) | 0 (0.0)   | 19 (55.9)  | 15 (44.1)  | 30 (88.2)  | 4 (11.8)  | 13 (38.2)  | 21 (61.8)  |        |               |             |        |                  |
| 2–3 children                                                 | 223 (91.8) | 20 (8.2)  | 227 (93.4) | 16 (6.6)  | 174 (71.6) | 69 (28.4)  | 204 (84.0) | 39 (16.0) | 124 (51.0) | 119 (49.0) |        |               |             |        |                  |
| More than 3 children                                         | 163 (94.2) | 10 (5.8)  | 168 (97.1) | 5 (2.9)   | 112 (64.7) | 61 (35.3)  | 141 (81.5) | 32 (18.5) | 70 (40.5)  | 103 (59.5) |        |               |             |        |                  |
| <b>Parental education level</b>                              |            |           |            |           |            |            |            |           |            |            | 0.83   | 0.50          | <b>0.01</b> | 0.66   | 0.28             |
| Illiterate                                                   | 33 (94.3)  | 2 (5.7)   | 34 (97.1)  | 1 (2.9)   | 30 (85.7)  | 5 (14.3)   | 31 (88.6)  | 4 (11.4)  | 12 (34.3)  | 23 (65.7)  |        |               |             |        |                  |
| School level                                                 | 271 (92.8) | 21 (7.2)  | 280 (95.9) | 12 (4.1)  | 185 (63.4) | 107 (36.6) | 243 (83.2) | 49 (16.8) | 134 (45.9) | 158 (54.1) |        |               |             |        |                  |
| University level                                             | 116 (94.3) | 7 (5.7)   | 115 (93.5) | 8 (6.5)   | 90 (73.2)  | 33 (26.8)  | 101 (82.1) | 22 (17.9) | 61 (49.6)  | 62 (50.4)  |        |               |             |        |                  |
| <b>Parental employment status</b>                            |            |           |            |           |            |            |            |           |            |            | 0.65   | 0.87          | 0.76        | 0.21   | 0.98             |
| Unemployed                                                   | 206 (92.8) | 16 (7.2)  | 212 (95.5) | 10 (4.5)  | 152 (68.5) | 70 (31.5)  | 180 (81.1) | 42 (18.9) | 102 (45.9) | 120 (54.1) |        |               |             |        |                  |
| Employed                                                     | 214 (93.9) | 14 (6.1)  | 217 (95.2) | 11 (4.8)  | 153 (67.1) | 75 (32.9)  | 195 (85.5) | 33 (14.5) | 105 (46.1) | 123 (53.9) |        |               |             |        |                  |
| <b>Household's monthly income</b>                            |            |           |            |           |            |            |            |           |            |            | 0.75 * | 0.23 *        | 0.22        | 0.28   | 0.09             |
| None                                                         | 33 (94.3)  | 2 (5.7)   | 35 (100.0) | 0 (0.0)   | 21 (60.0)  | 14 (40.0)  | 26 (74.3)  | 9 (25.7)  | 12 (34.3)  | 23 (65.7)  |        |               |             |        |                  |
| Less than 1.5 million L.B.P.                                 | 61 (91.0)  | 6 (9.0)   | 65 (97.0)  | 2 (3.0)   | 47 (70.1)  | 20 (29.9)  | 61 (91.0)  | 6 (9.0)   | 26 (38.8)  | 41 (61.2)  |        |               |             |        |                  |
| ≥1.5 million L.B.P.                                          | 274 (93.2) | 20 (6.8)  | 276 (93.9) | 18 (6.1)  | 207 (70.4) | 87 (29.6)  | 243 (82.7) | 51 (17.3) | 143 (48.6) | 151 (51.4) |        |               |             |        |                  |
| ≤300 USD                                                     | 34 (94.4)  | 2 (5.6)   | 36 (100.0) | 0 (0.0)   | 20 (55.6)  | 16 (44.4)  | 30 (83.3)  | 6 (16.7)  | 14 (38.9)  | 22 (61.1)  |        |               |             |        |                  |
| More than 300 USD                                            | 18 (100.0) | 0 (0.0)   | 17 (94.4)  | 1 (5.6)   | 10 (55.6)  | 8 944.4)   | 15 (83.3)  | 3 (16.7)  | 12 (66.7)  | 6 (33.3)   |        |               |             |        |                  |
| <b>Lebanese economic crises impact on household's income</b> |            |           |            |           |            |            |            |           |            |            | 0.77   | <b>0.04 *</b> | 0.52        | 0.76   | 0.34             |
| No impact                                                    | 305 (93.8) | 20 (6.2)  | 313 (96.3) | 12 (3.7)  | 218 (67.1) | 107 (32.9) | 269 (82.8) | 56 (17.2) | 152 (46.8) | 173 (53.2) |        |               |             |        |                  |
| Decline                                                      | 90 (91.8)  | 8 (8.2)   | 89 (90.8)  | 9 (9.2)   | 66 (67.3)  | 21 (32.7)  | 84 (85.7)  | 14 (14.3) | 40 (40.8)  | 58 (59.2)  |        |               |             |        |                  |
| Increase                                                     | 25 (92.6)  | 2 (7.4)   | 27 (100.0) | 0 (0.0)   | 21 (77.8)  | 6 (22.2)   | 22 (81.5)  | 5 (18.5)  | 15 (55.6)  | 12 (44.4)  |        |               |             |        |                  |
| <b>Household crowding index</b>                              |            |           |            |           |            |            |            |           |            |            | 0.56   | 0.85          | 0.85        | 0.87   | <b>0.01</b>      |
| No crowding                                                  | 233 (94.0) | 15 (6.0)  | 236 (95.2) | 12 (4.8)  | 169 (68.1) | 79 (31.9)  | 206 (83.1) | 42 (16.9) | 127 (51.2) | 121 (48.8) |        |               |             |        |                  |
| Crowding/overcrowding                                        | 187 (92.6) | 15 (7.4)  | 193 (95.5) | 9 (4.5)   | 136 (67.3) | 66 (32.7)  | 169 (83.7) | 33 (16.3) | 80 (39.6)  | 122 (60.4) |        |               |             |        |                  |
| <b>Household FI</b>                                          |            |           |            |           |            |            |            |           |            |            | 0.83   | 0.52          | 0.68        | 0.30   | <b>&lt;0.001</b> |
| Food-secure                                                  | 134 (93.7) | 9 (6.3)   | 135 (94.4) | 8 (5.6)   | 95 (66.4)  | 48 (33.6)  | 123 (86.0) | 20 (14.0) | 96 (67.1)  | 47 (32.9)  |        |               |             |        |                  |
| Food-insecure                                                | 286 (93.2) | 21 (6.8)  | 294 (95.8) | 13 (4.2)  | 210 (68.4) | 97 (31.6)  | 252 (82.1) | 55 (17.9) | 111 (36.2) | 196 (63.8) |        |               |             |        |                  |
| <b>DD</b>                                                    |            |           |            |           |            |            |            |           |            |            |        |               |             |        |                  |
| Households with diversified diet (FCS < 42)                  | 171 (40.7) | 11 (36.7) | 174 (40.6) | 8 (38.1)  | 117 (38.4) | 65 (44.8)  | 146 (38.9) | 36 (48)   | 85 (36.2)  | 97 (45.1)  | 0.663  | 0.822         | 0.191       | 0.144  | 0.053            |
| Households with undiversified diet (FCS > 42)                | 249 (59.3) | 19 (63.3) | 255 (59.4) | 13 (61.9) | 188 (61.6) | 80 (55.2)  | 229(61.1)  | 39 (52)   | 150 (63.8) | 118 (54.9) |        |               |             |        |                  |

(a) Significance level related to stunting; (b) Significance level related to thinness; (c) Significance level related to overweight/obesity; (d) Significance level related to anemia; (e) Significance level related to self-reported FI. Bold values are significant at  $p$ -value <0.05 for  $\chi^2$  or Fisher's exact test; \*  $p$ -value determined based on Fisher's exact test (when one or more of the cell counts in a  $2 \times 2$  table are less than 5. FI, food insecurity; DD, dietary diversity; FCS, food consumption score; HAZ, height-for-age Z score; BAZ, BMI-for-age Z score; SD, standard deviation.
